# Supplementary material
Source: MDPI journal article supplement (https://www.mdpi.com/2297-8739/10/5/274)

Supplementary Materials to :

# *Cucumis metuliferus* L. Fruits Extract with Antioxidant, Anti-inflammatory, and Antidiabetic Properties as Source of Ursolic Acid

Anna Cazanevscaia Busuioc<sup>1</sup>, Giorgia Valentina Costea<sup>2</sup>, Andreea Veronica Dediu Botezatu<sup>1</sup>, Bianca Furdui<sup>1\*</sup> and Rodica Mihaela Dinica<sup>1\*</sup>

<sup>1</sup> Department of Chemistry, Physics and Environment, “Dunărea de Jos” University of Galati, 111 Domnească Street, 800201 Galati, Romania; email: [anna.cazanevscaia@ugal.ro](mailto:anna.cazanevscaia@ugal.ro) (A.C.B.); [andreea.botezatu@ugal.ro](mailto:andreea.botezatu@ugal.ro) (A.V.D.B.); [rodica.dinica@ugal.ro](mailto:rodica.dinica@ugal.ro) (R.M.D.); [bianca.furdui@ugal.ro](mailto:bianca.furdui@ugal.ro) (B.F.)

<sup>2</sup> Dunărea de Jos” University of Galati, Department of Food Science, Food Engineering and Applied Biotechnology, 111 Domnească Street 800201, Galati, Romania [giorgiana.costea@ugal.ro](mailto:giorgiana.costea@ugal.ro) (G.V.C.)

\* Correspondence: [rodica.dinica@ugal.ro](mailto:rodica.dinica@ugal.ro) (R.M.D.) ; [bianca.furdui@ugal.ro](mailto:bianca.furdui@ugal.ro) (B.F.)

**Figure S1.** MS Spectra of fraction of *C. metuliferus* species with ursolic acid (negative mode) performed on mass spectrometry

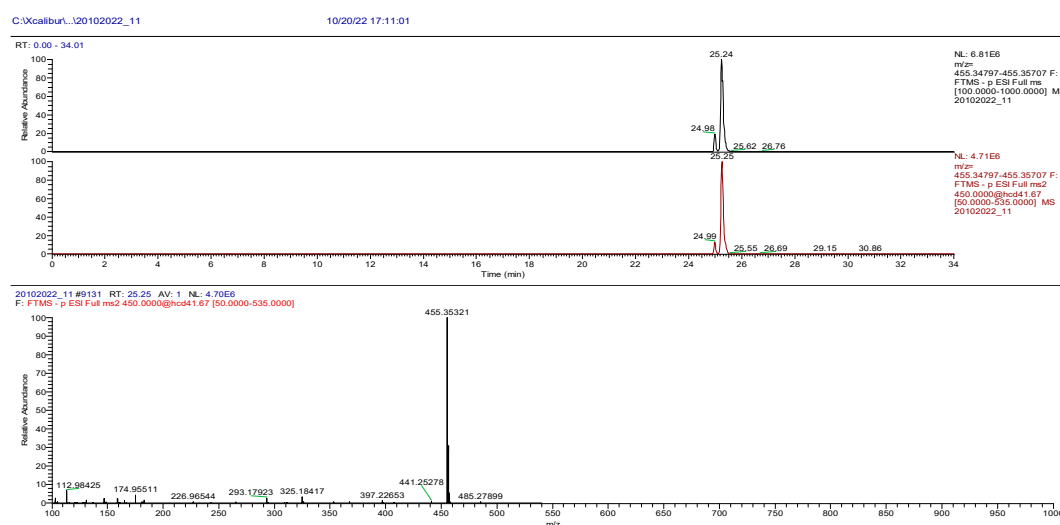

**Citation:** Lastname, F.; Lastname, F.; Lastname, F. Title. *Separations* **2022**, *9*, x. <https://doi.org/10.3390/xxxxx>

Academic Editor: Firstname Last-name

Received: date

Accepted: date

Published: date

**Publisher’s Note:** MDPI stays neutral with regard to jurisdictional claims in published maps and institutional affiliations.

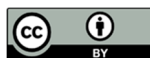

**Copyright:** © 2022 by the authors. Submitted for possible open access publication under the terms and conditions of the Creative Commons Attribution (CC BY) license (<https://creativecommons.org/licenses/by/4.0/>).

**Figure S2.** Proposed fragmentation pattern of ursolic acid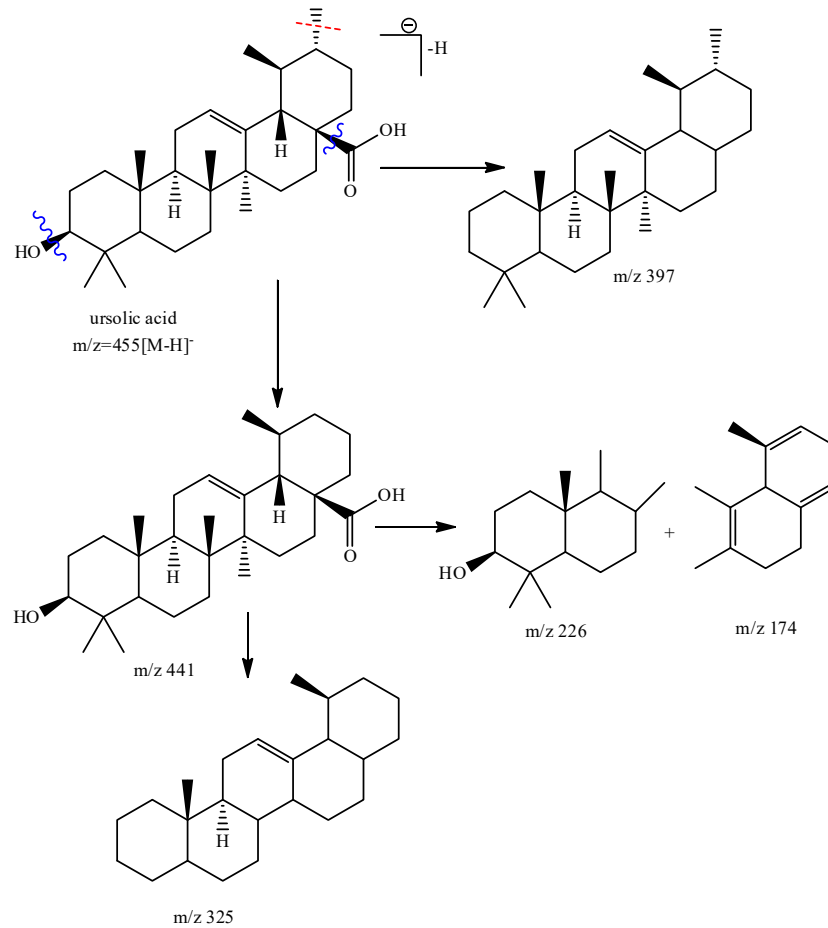**Figure S3.** The  $^1H$  NMR spectrum of the ursolic acid fraction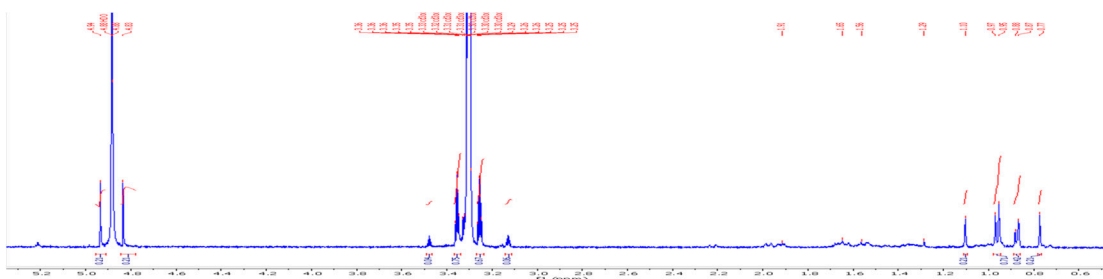

Supplement: s1 [file s1]
